# Supplementary material for: Opportunities and Challenges for Family-Centered Postpartum Care During the COVID-19 Pandemic: A Qualitative Study of Nurse Perspectives
Source: Research Square preprint supplement (doi:10.21203/rs.3.rs-693067/v1), 2021-09-13
Supplement: Supplementary file 1 [file f5c4720a2d93cb93f6f27da5.docx]

**Table 1:** *Final coding structure with categories, themes and examples*

| **Category** | **Theme Codes** | **Examples** |
| --- | --- | --- |
| Hospital Policy | Support person policy | “Well, my hospital only the support person is allowed to visit, which honestly 98% is the father, unless the father's not involved, then it will be a grandmother or something. But for the most part, it's only the dads that can come to the hospital.” |
| Come-and-go policy | “No. It's still restricted to one person. They can come and go as they please, but only during visiting hours, which is 9:00 AM to 8:00 PM.” |
| Accommodations for support person | “No, our hospital only provides meals for mom…. But right now dads, they have the option to set up a tray, but they have to pay for it.” |
| Changes in Nurse Attitudes and Practice | Less hands-on education | “We do [the bath] in the nursery with the big windows. There's times where they go and stand outside. They actually can't go into the nursery anymore….They stand outside, and a lot of times take pictures and look what we're doing.” |
| Early discharge | “The only thing that I would say is more challenging is that we're having vaginal deliveries, 24 hour discharges, and then for our C-sections they have the option to leave at 48 hours if there's, of course, no complications.” |
| Positive attitudes | “It's changed dramatically, but really for our unit is good. Even the patients and they even, they love [the restricted visitation policy].” |
| No change in provision of care/education | “The way I provide education? I would say it's the same…. Except for having to wear the mask, I don't feel that it's like a barrier to providing education or anything.” |
| Fewer distractions | “And like I said, without all the visitors, I feel like the education part is actually a lot better, because I feel like there's not as many distractions when you are trying to educate.” |
| More effective education | “… I'm able to not just teach them, but also get to know them and their family dynamic at home, whether it be them having older kids, and how to get them involved, and just how mom and dad interact with each other, and how they can help each other out.” |
| Improved patient outcomes | “… after all the nursing assessments, all the things that we have to do is done, it's basically just getting rest and feeding babies the rest of the day. So I feel like they are definitely getting a lot more rest than what they were before COVID.” |
| More nurse-parent interaction | “There's more conversation happening between families and nurses, because if you have five visitors in the room, you're kind of trying to hurry your nurse out of the room so you can get back to visiting.” |
| Father[[1]](#footnote-1) & Family  Engagement | Greater father presence | “I feel like we're seeing more [fathers] because once they're there, they kind of stay there, where before they would come and they would go.” |
| Fathers are more engaged | “Like I said, they're stepping up and just in terms of because they know that they're the only one that's there to really help mom in terms of their family. They'll help with diaper changes, they'll help hold the baby while she's sleeping…. I think just being more involved and available to the mom in general.” |
| Increased father agency | “And so in some ways maybe it gives dad a little bit more space to be there, and ask his own questions…” |
| Lack of backup support | “They know they can't depend on grandmas coming and sisters and aunts coming. They know that they are the person that this mom is going to be dependent on.” |
| Family constraints & concerns | “It seems like they want others to be present, other female family members to be there…. I do see dads leave because they have to go to work or they have other kids to take care of. They have animals to take care of. They want to get some rest. They can't sleep on our little sofas and they need to get a good rest.” |

1. In the coding scheme and in Table 1, references are to “fathers” rather than “support person” because nurses were asked to reflect on father engagement, specifically, as part of the larger study of nurse-father interaction. [↑](#footnote-ref-1)
